# Supplementary material
Source: PubMed Central journal article supplement (PMC1765463)

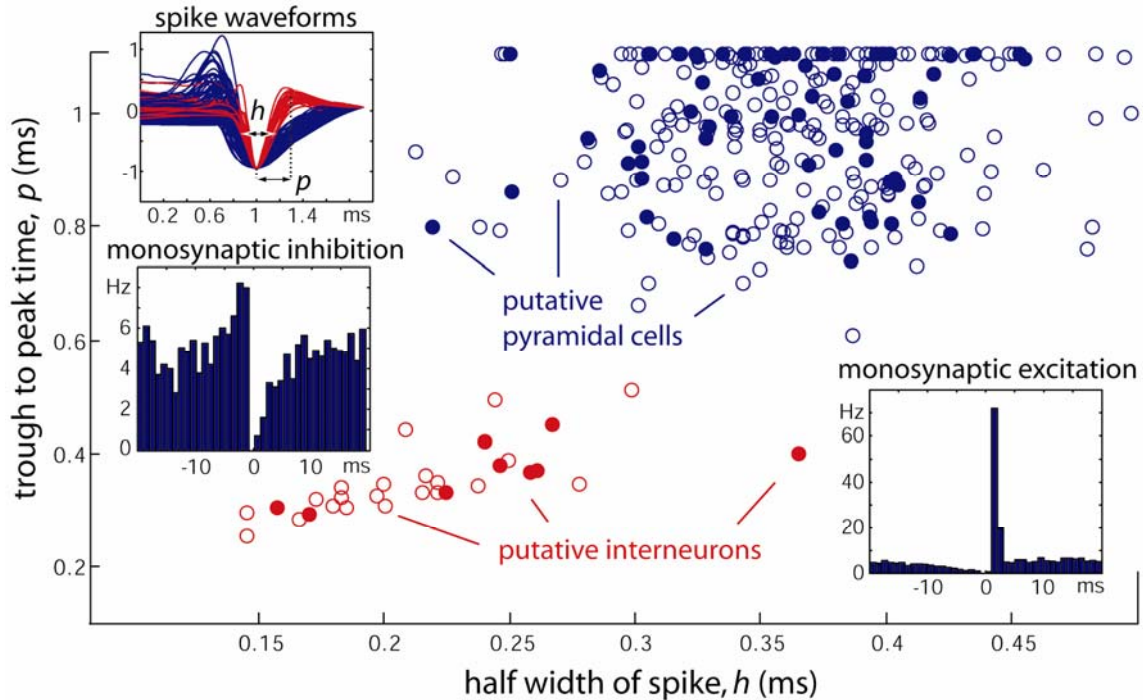

Supplement: pnas_0605643104_1.pdf [file pnas_0605643104_1.pdf]

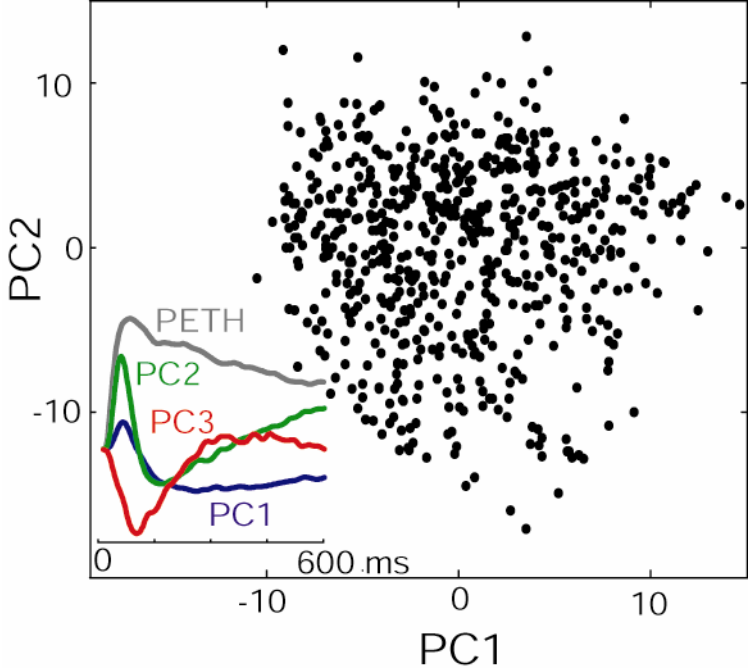

Supplement: pnas_0605643104_2.pdf [file pnas_0605643104_2.pdf]

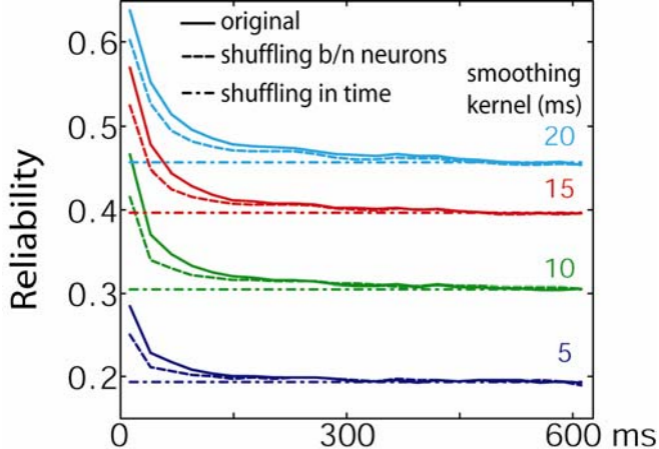

Supplement: pnas_0605643104_3.pdf [file pnas_0605643104_3.pdf]
